# Supplementary material for: Substrate specificities and reaction kinetics of the yeast oligosaccharyltransferase isoforms
Source: PubMed Central journal article supplement (PMC8191290; doi:10.1016/j.jbc.2021.100809), 2021-05-21
Supplement: mmc1.pdf [file mmc1.pdf]

## Supporting Information

### Substrate specificities and reaction kinetics of the yeast oligosaccharyltransferase isoforms

Jillianne Eyring<sup>1</sup>, Chia-Wei Lin<sup>1,2</sup>, Elsy Mankah Ngwa<sup>1</sup>, Jérémy Boilevin<sup>3</sup>, Giorgio Pesciullesi<sup>3</sup>, Kaspar P. Locher<sup>4</sup>, Tamis Darbre<sup>3</sup>, Jean-Louis Reymond<sup>3</sup>, Markus Aebi<sup>1\*</sup>

<sup>1</sup>Institute of Microbiology, Department of Biology, ETH Zürich, 8093 Zürich, Switzerland

<sup>2</sup>Functional Genomics Center Zürich, University of Zürich/ETH Zürich, 8057 Zürich, Switzerland

<sup>3</sup>Department of Chemistry and Biochemistry, University of Berne, 3012 Bern, Switzerland

<sup>4</sup>Institute of Molecular Biology and Biophysics, Department of Biology, ETH Zürich, 8093 Zürich, Switzerland

\*Corresponding author: Markus Aebi  
E-Mail: markus.aebi@micro.biol.ethz.ch

**Supp. Table 1. Library of unlabeled peptides derived from yeast sequences**

| Peptide #  | Peptide name     | Peptide a.a. sequence | Solvent used |
|------------|------------------|-----------------------|--------------|
| Peptide 1  | Pdi site 1 12mer | TLVEKNITLAQI          | DMSO         |
| Peptide 2  | Pdi site 2 12mer | KNSDVNNSIDYE          | DMSO         |
| Peptide 3  | Pdi site 3 12mer | PAYLANETFVTP          | DMSO         |
| Peptide 4  | Pdi site 4 12mer | IDADFNATFYSM          | DMSO         |
| Peptide 5  | Pdi site 5 12mer | ADTYANATSDVL          | DMSO         |
| Peptide 6  | Pdi site 1 6mer  | EKNITL                | DMSO         |
| Peptide 8  | Pdi site 1 20mer | EYVKAAETLVEKNITLAQID  | 3 % ammonia* |
| Peptide 9  | Cpy 1            | LGIDPNVTQYTG          | DMSO         |
| Peptide 10 | Cpy 2            | SQKVRNWTASIT          | DMSO         |
| Peptide 12 | Wpb1             | LSPSGNDSETQY          | DMSO         |
| Peptide 13 | Gpi12            | RVRELNESAALL          | DMSO         |
| Peptide 14 | Sec66            | TKFSNNGTFFET          | DMSO         |
| Peptide 15 | Gpi13            | ILEPLAKNISNT          | DMSO         |
| Peptide 16 | Gas1             | FFYSNNGSQFYI          | DMSO         |
| Peptide 17 | Stt3             | DNNTWNNTHIAI          | DMSO         |
| Peptide 18 | Rot1             | TYSRYNQTFK            | DMSO         |
| Peptide 19 | Gpi16            | GAPLFNSTEKLY          | DMSO         |
| Peptide 20 | Plb2             | SDAGFNISLSDL          | DMSO         |

DMSO, dimethyl sulfoxide; \*separate control reaction used containing 3 % ammonia

**Supp. Table 2. Turnover of synthetic TAMRA-labeled peptides**

| Peptide            | Glycopeptide detected | Turnover after 5 min (%) | Relative turnover (%) |
|--------------------|-----------------------|--------------------------|-----------------------|
| TAMRA-DANYTK       | Yes                   | 6                        | 100                   |
| TAMRA-YANATS       | Yes                   | 84                       | 1400                  |
| TAMRA-ADTYANATSDVL | Yes                   | 10                       | 167                   |

TAMRA, tetramethylrhodamine

Turnover of TAMRA-labeled peptides after 5 min was determined using 0.5  $\mu$ M OST3 complex, 20  $\mu$ M indicated peptide and 150  $\mu$ M LLO C20. Relative turnover compared to TAMRA-DANYTK is given by defining TAMRA-DANYTK turnover as 100 %.

**Supp. Table 3. Peptide and glycopeptide masses used for site-occupancy analysis by mass spectrometry**

| Protein | Glycosite | Peptide sequence<br>N* = glycosylated asparagine | Peptide            |   | Peptide + HexNAc   |          |     |          |
|---------|-----------|--------------------------------------------------|--------------------|---|--------------------|----------|-----|----------|
|         |           |                                                  | [M+H] <sup>+</sup> | z | [M+H] <sup>+</sup> | z        | m/z |          |
| Ost1    | N99       | VSFFSAYFTNEATFLNSQLLAN*STTAP<br>GDDGESEIR        | 3899.844           | 4 | 975.711            | 4102.922 | 4   | 1026.480 |
|         |           |                                                  | 2686.417           | 3 | 896.139            | 2889.485 | 3   | 963.828  |
|         |           |                                                  | 1546.819           | 2 | 773.909            | 1749.898 | 2   | 875.449  |
|         |           |                                                  | 1020.621           | 2 | 510.811            | 1222.621 | 2   | 611.811  |
| Stt3    | N539      | TTLVDNNTWN*NTHIAIVGK                             | 2111.106           | 3 | 704.369            | 2314.185 | 3   | 772.062  |
| Wbp1    | N60       | LEYLDIN*STSTTVLDYDKEQR                           | 2503.237           | 3 | 835.079            | 2706.315 | 3   | 902.772  |
|         |           |                                                  | 2804.340           | 3 | 935.447            | 3007.419 | 3   | 1003.140 |

N\*, glycosylated asparagine; [M+H]<sup>+</sup>, mass of singly protonated molecule; z, ion charge; m/z, mass to charge ratio; HexNAc, *N*-acetylhexosamine.

**Supp. Table 4. Glycopeptide masses used for glycan profile analysis by mass spectrometry**

| Protein | Glycosite | Peptide sequence<br>N* = glycosylated asparagine | Peptide<br>[M+H] <sup>+</sup> | Glycan<br>composition<br>+ HexNAc <sub>2</sub> | Glycan<br>[M+H] <sup>+</sup> | Glyco-<br>peptide<br>[M+H] <sup>+</sup> | z | m/z      |
|---------|-----------|--------------------------------------------------|-------------------------------|------------------------------------------------|------------------------------|-----------------------------------------|---|----------|
|         |           |                                                  |                               |                                                |                              |                                         |   |          |
|         | 3899.825  | Hex8                                             | 1702.576                      | 5602.418                                       | 4                            | 1401.360                                |   |          |
|         | 3899.825  | Hex9                                             | 1864.646                      | 5764.471                                       | 4                            | 1441.874                                |   |          |
|         | 3899.825  | Hex10                                            | 2026.704                      | 5926.529                                       | 4                            | 1482.388                                |   |          |
|         | 3899.825  | Hex11                                            | 2188.760                      | 6088.585                                       | 4                            | 1522.902                                |   |          |
|         | 3899.825  | Hex12                                            | 2350.816                      | 6250.641                                       | 4                            | 1563.416                                |   |          |
|         | N217      | FSSN*ETLAIVYSHNAPLNQV<br>VNLR                    | 2686.395                      | Hex7                                           | 1540.540                     | 4226.935                                | 3 | 1409.650 |
|         |           |                                                  | 2686.395                      | Hex8                                           | 1702.593                     | 4388.988                                | 3 | 1463.668 |
|         |           |                                                  | 2686.395                      | Hex9                                           | 1864.646                     | 4551.041                                | 3 | 1517.686 |
|         |           |                                                  | 2686.395                      | Hex10                                          | 2026.695                     | 4713.090                                | 3 | 1571.702 |
|         |           |                                                  | 2686.395                      | Hex11                                          | 2188.760                     | 4875.155                                | 3 | 1625.724 |
|         |           |                                                  | 2686.395                      | Hex12                                          | 2350.816                     | 5037.211                                | 3 | 1679.742 |
| Stt3    | N539      | TTLVDNNTWN*NTHIAIVGK                             | 2111.088                      | Hex7                                           | 1540.540                     | 3651.628                                | 3 | 1217.881 |
|         |           |                                                  | 2111.088                      | Hex8                                           | 1702.593                     | 3813.681                                | 3 | 1271.899 |
|         |           |                                                  | 2111.088                      | Hex9                                           | 1864.646                     | 3975.734                                | 3 | 1325.917 |
|         |           |                                                  | 2111.088                      | Hex10                                          | 2026.703                     | 4137.791                                | 3 | 1379.936 |
|         |           |                                                  | 2111.088                      | Hex11                                          | 2188.788                     | 4299.876                                | 3 | 1433.964 |
|         |           |                                                  | 2111.088                      | Hex12                                          | 2350.848                     | 4461.936                                | 3 | 1487.984 |
| Wbp1    | N60       | NYKLEYLDIN*STSTTVLDYD<br>K                       | 2495.219                      | Hex7                                           | 1540.540                     | 4035.759                                | 3 | 1345.925 |
|         |           |                                                  | 2495.219                      | Hex8                                           | 1702.593                     | 4197.812                                | 3 | 1399.943 |
|         |           |                                                  | 2495.219                      | Hex9                                           | 1864.646                     | 4359.865                                | 3 | 1453.960 |
|         |           |                                                  | 2495.219                      | Hex10                                          | 2026.702                     | 4521.921                                | 3 | 1507.979 |
|         |           |                                                  | 2495.219                      | Hex11                                          | 2188.788                     | 4684.007                                | 3 | 1562.008 |
|         |           |                                                  | 2495.219                      | Hex12                                          | 2350.848                     | 4846.067                                | 3 | 1616.028 |
|         | N332      | LTLSPSGN*DSETQYYTTGEFI<br>LPDR                   | 2804.326                      | Hex7                                           | 1540.540                     | 4344.867                                | 3 | 1448.961 |
|         |           |                                                  | 2804.326                      | Hex8                                           | 1702.593                     | 4506.919                                | 3 | 1502.978 |
|         |           |                                                  | 2804.326                      | Hex9                                           | 1864.646                     | 4668.972                                | 3 | 1556.996 |
|         |           |                                                  | 2804.326                      | Hex10                                          | 2026.702                     | 4831.029                                | 3 | 1611.015 |
|         |           |                                                  | 2804.326                      | Hex11                                          | 2188.788                     | 4993.114                                | 3 | 1665.043 |
|         |           |                                                  | 2804.326                      | Hex12                                          | 2350.848                     | 5155.175                                | 3 | 1719.063 |

N\*, glycosylated asparagine; [M+H]<sup>+</sup>, mass of singly protonated molecule; z, ion charge; m/z, mass to charge ratio; HexNAc, *N*-acetylhexosamine; Hex#, number of hexoses (either glucose or mannose).

(A)

OST3

NL: 1.75E6

OST6

NL: 3.17E7

XIC: 975.711<sup>4+</sup>

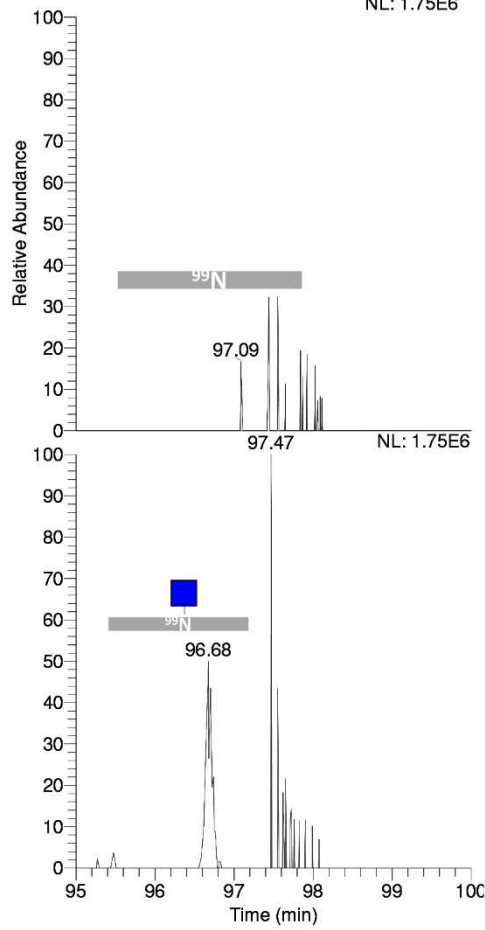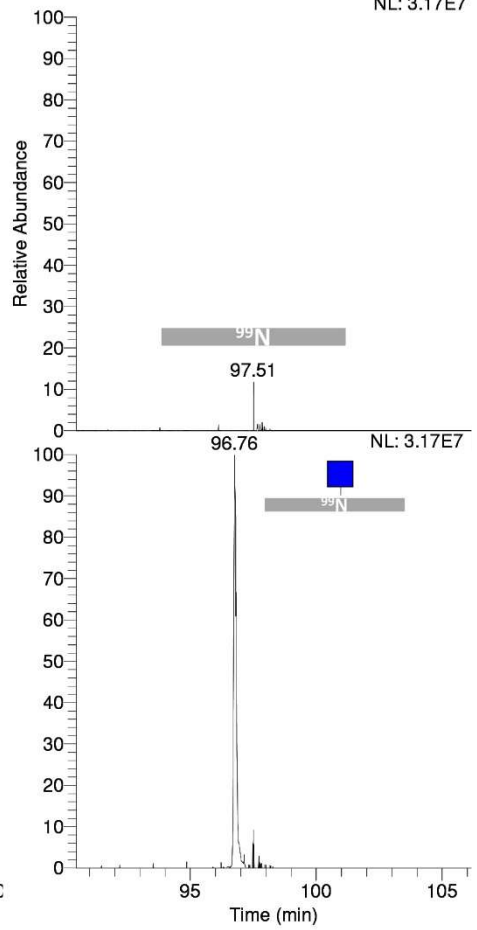

XIC: 1026.480<sup>4+</sup>

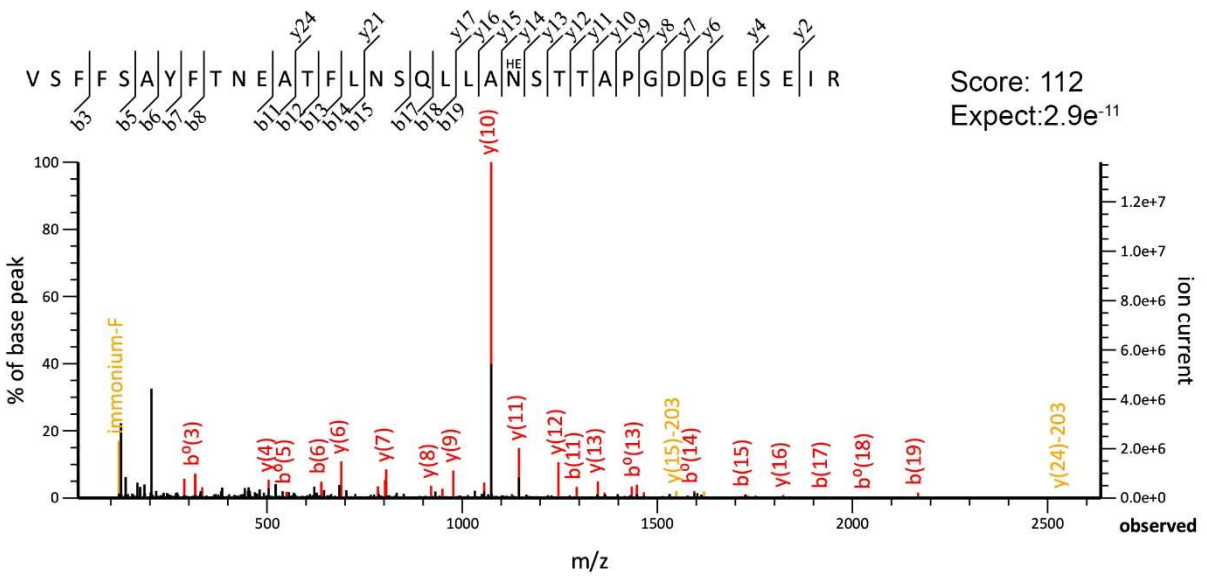

(B)

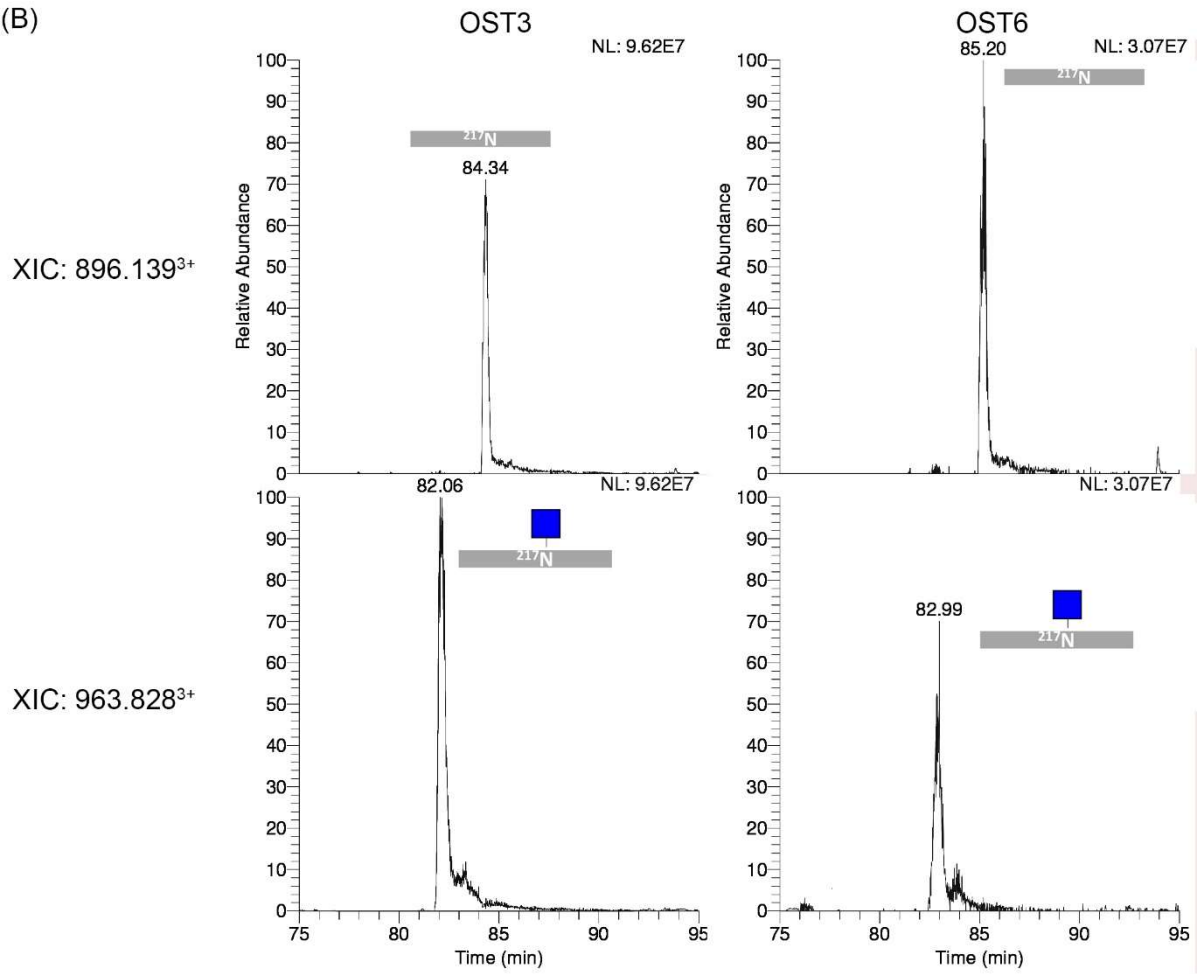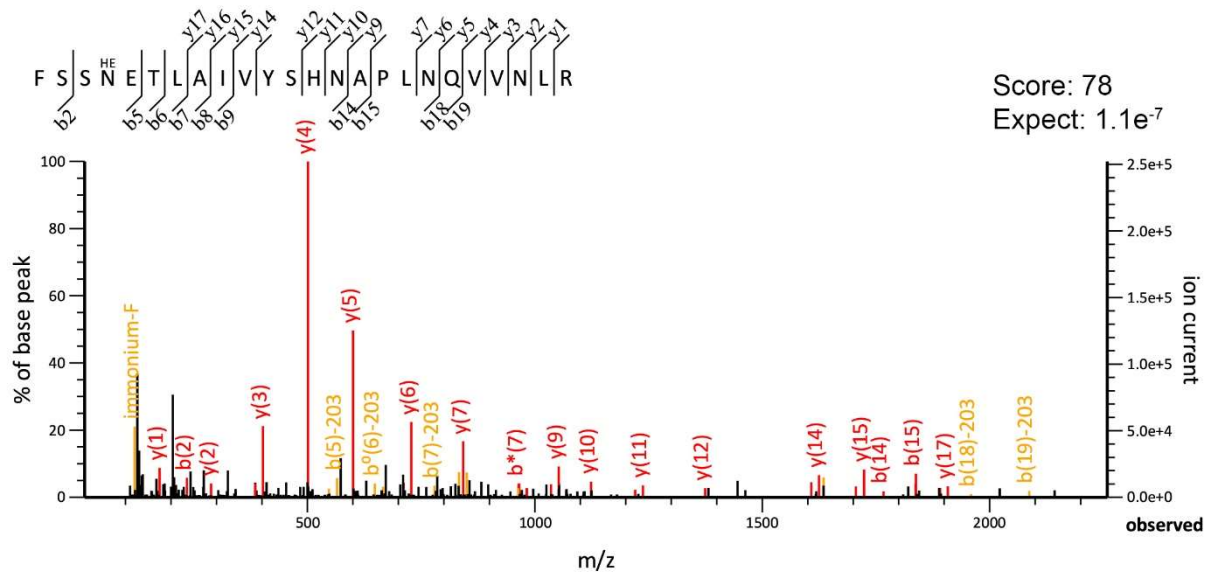

(C)

OST3

NL: 1.79E7

OST6

NL: 1.56E7

XIC: 945.4811<sup>2+</sup>

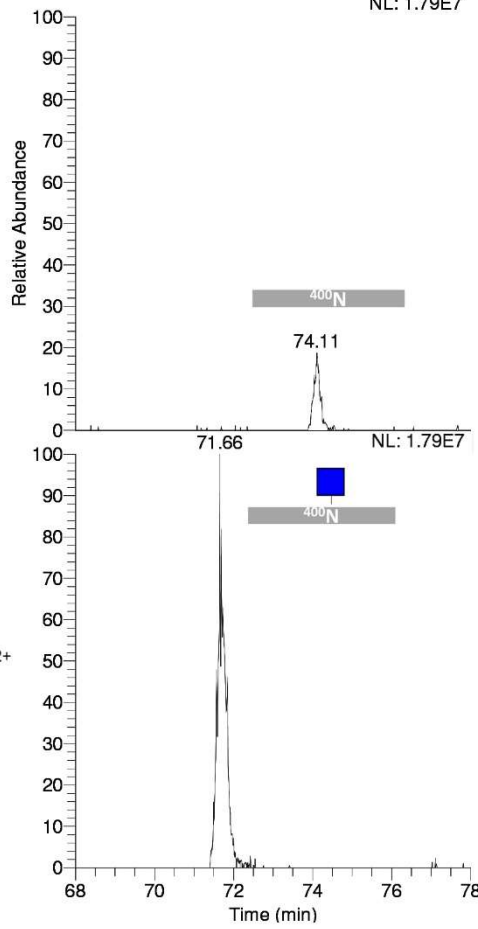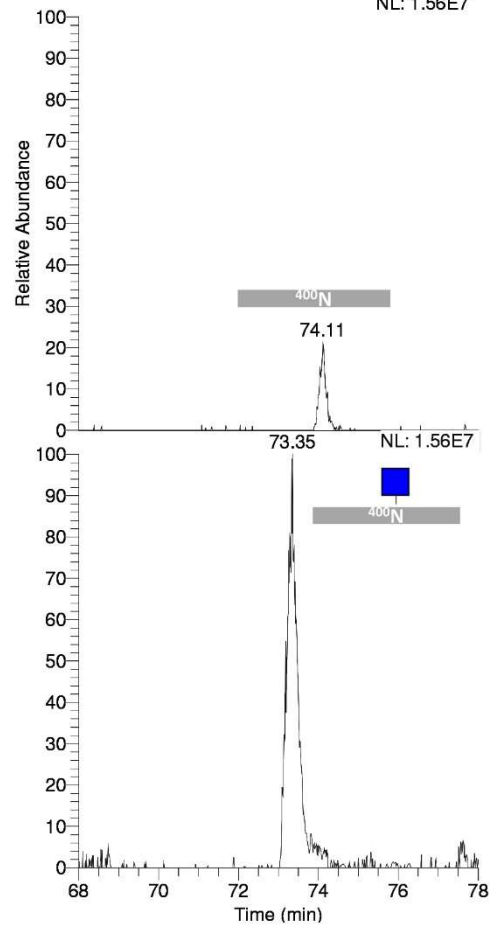

D I D S P V P F T N<sup>HE</sup> V S I E T Q K  
b<sub>2</sub> b<sub>3</sub> b<sub>4</sub> b<sub>5</sub> b<sub>6</sub> b<sub>8</sub> y<sub>14</sub> y<sub>13</sub> y<sub>12</sub> y<sub>11</sub> y<sub>10</sub> y<sub>9</sub> y<sub>8</sub> y<sub>7</sub> y<sub>6</sub> y<sub>5</sub> y<sub>4</sub> y<sub>3</sub>

Score: 78

Expect: 2.3e<sup>-7</sup>

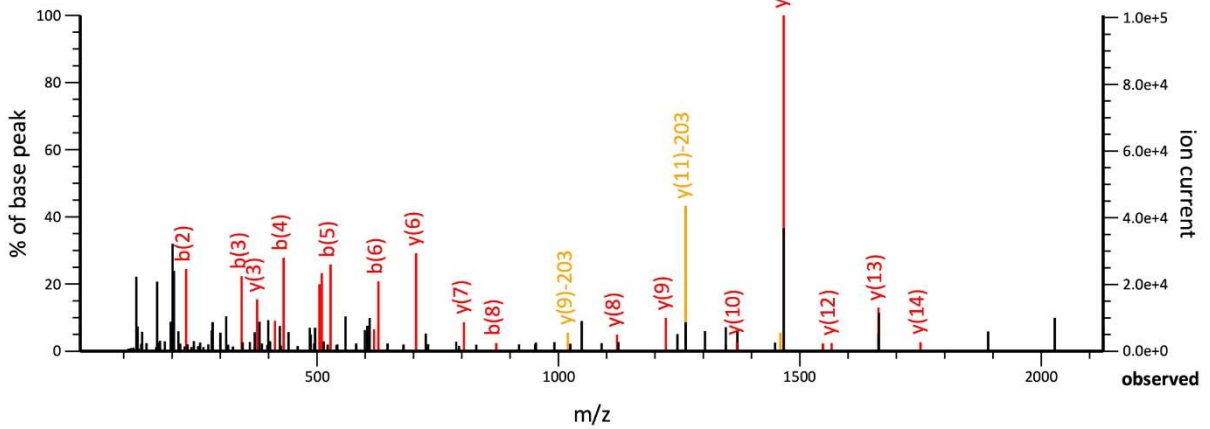

(D)

OST3

OST6

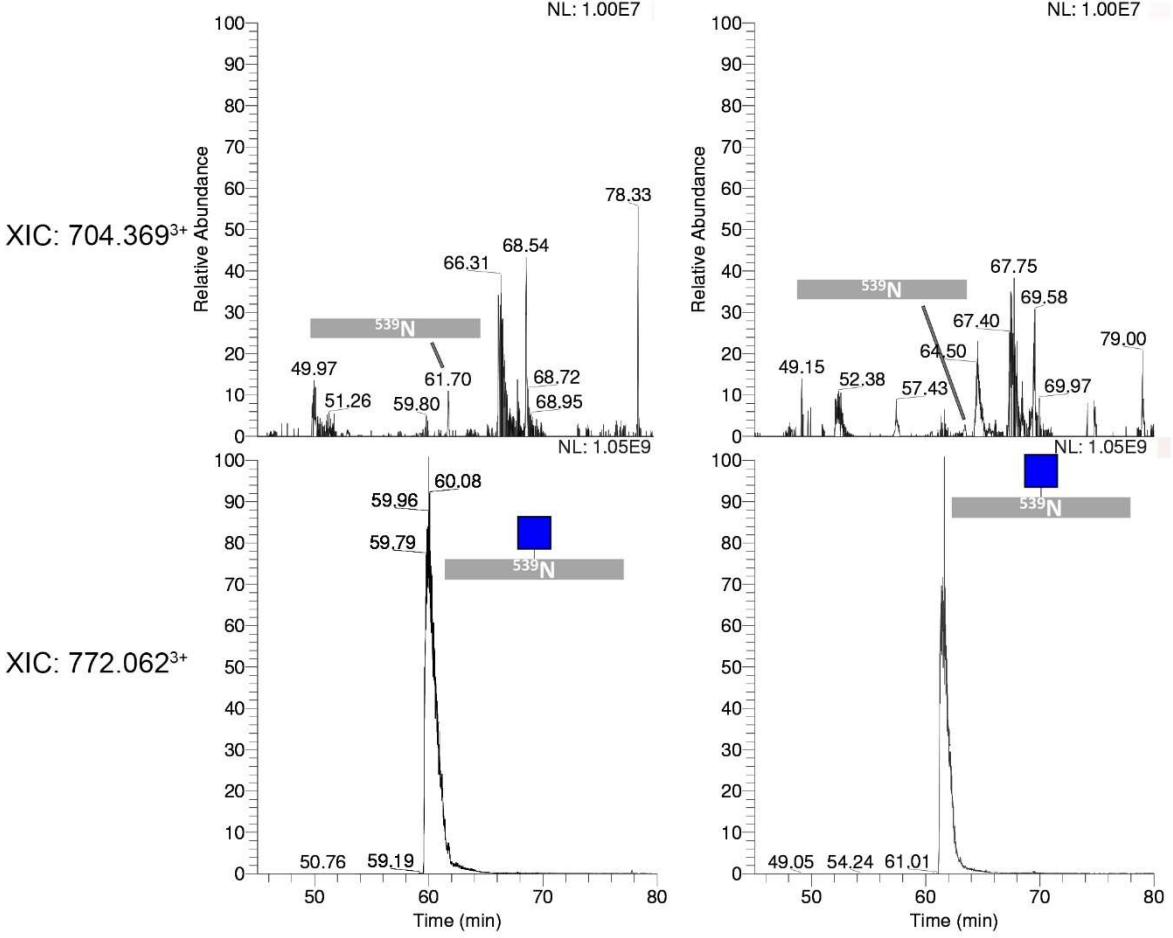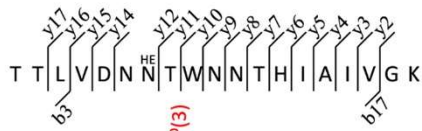

Mascot score: 112

Expect: 3.3e-11

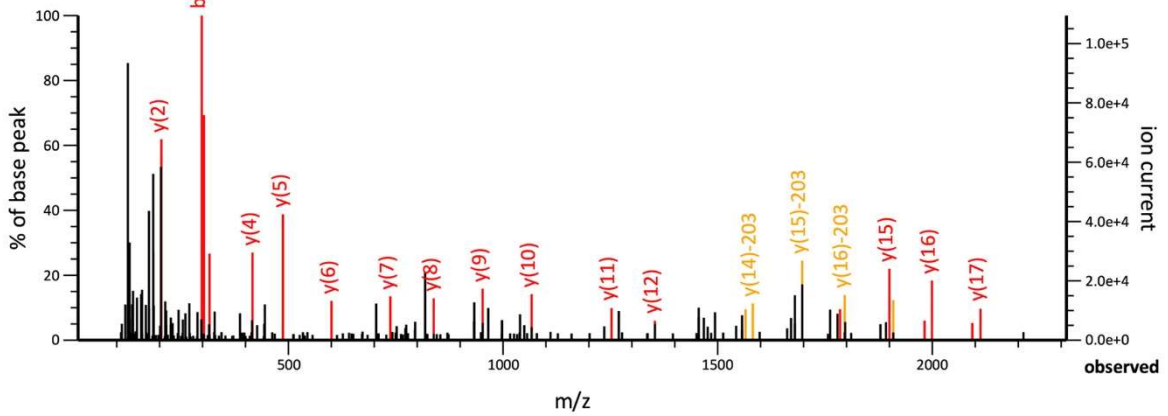

(E)

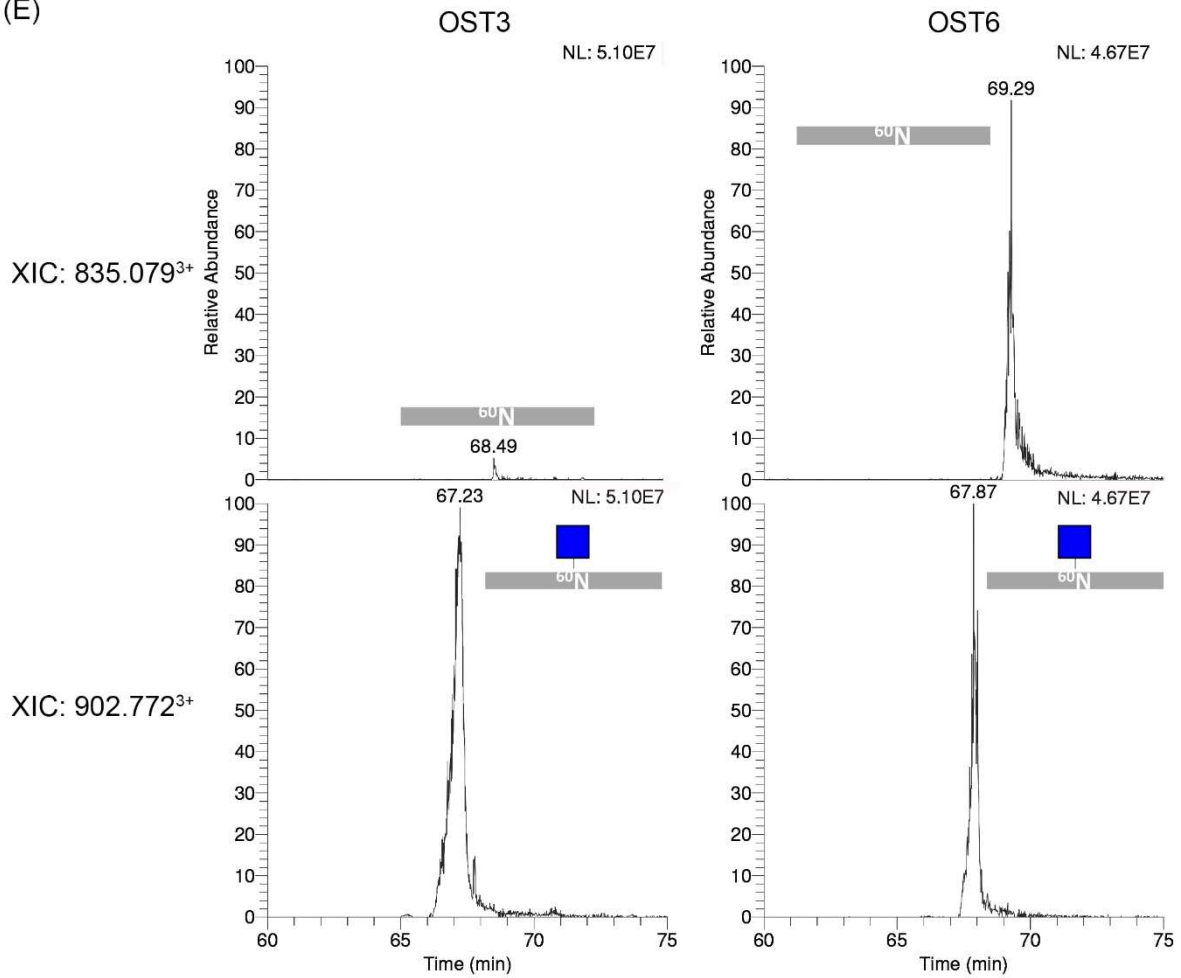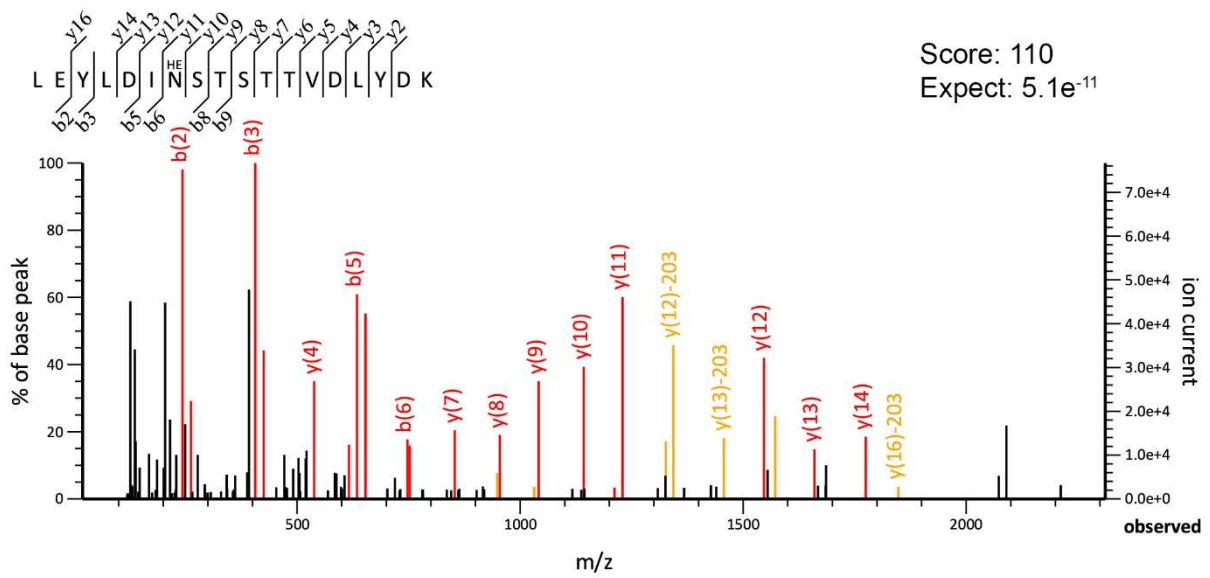



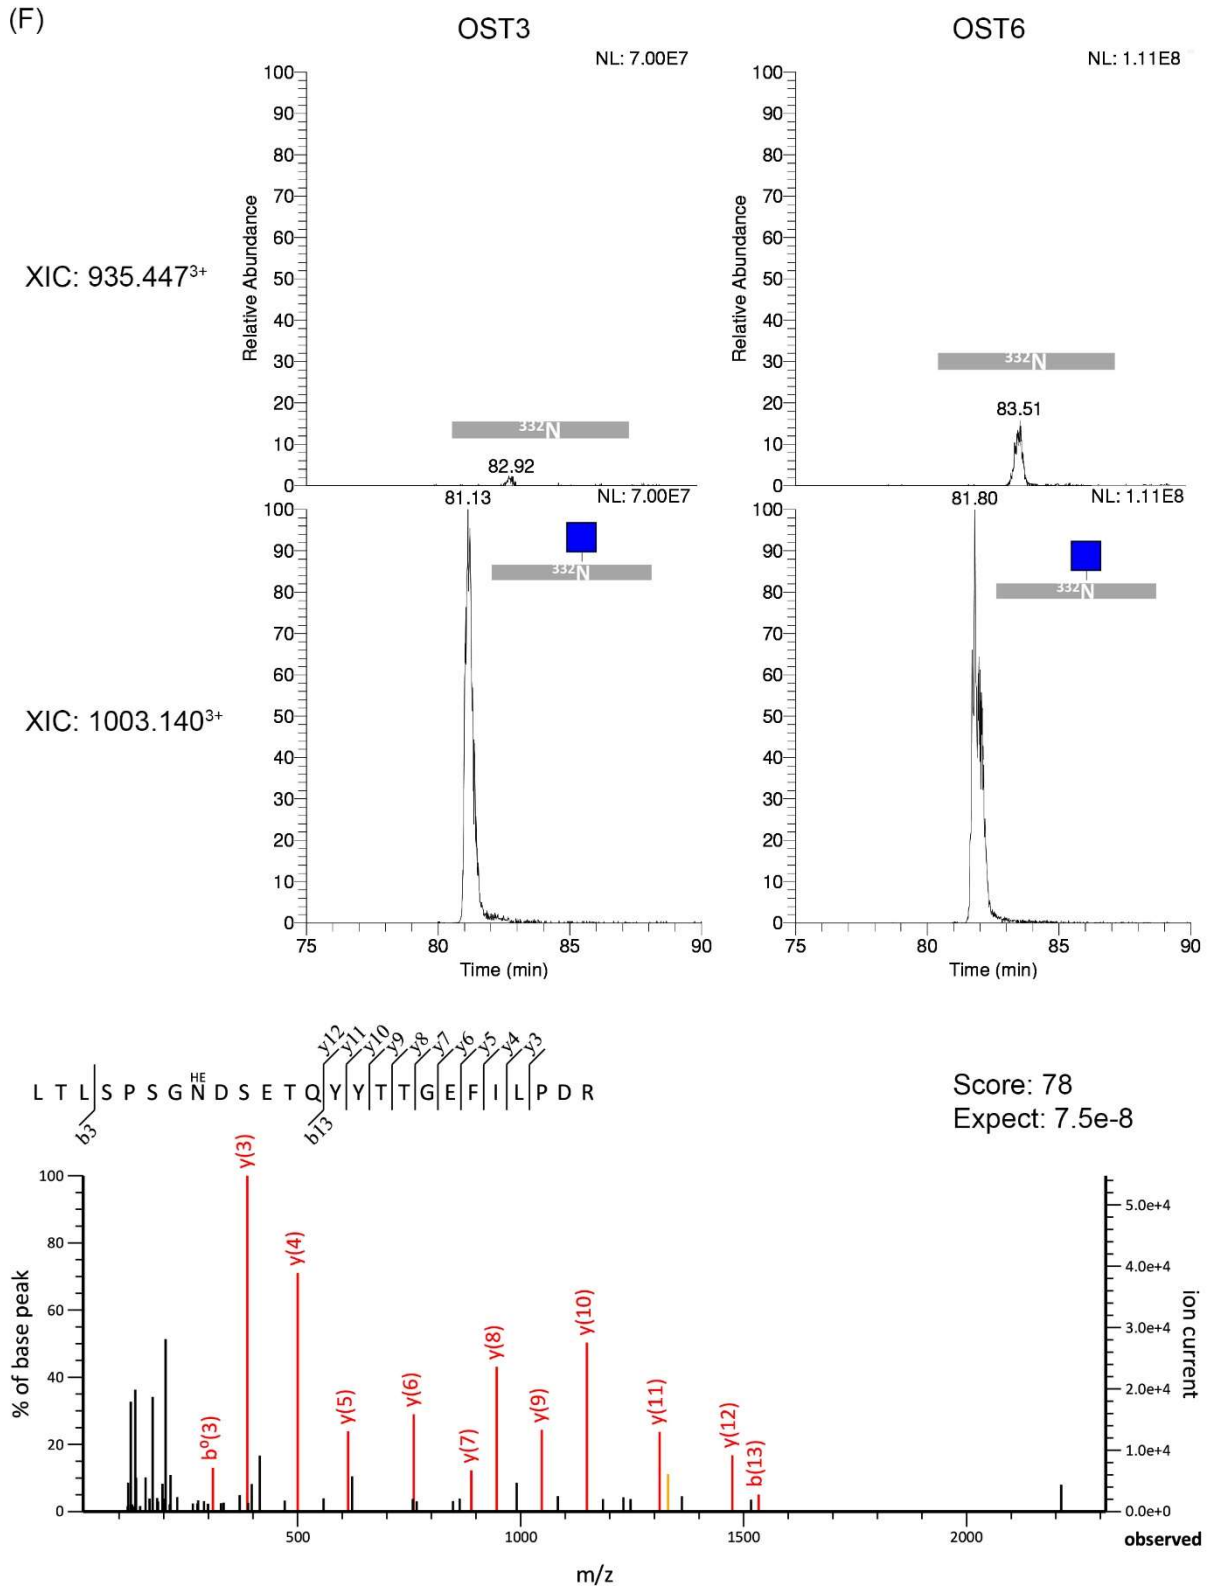

**Supp. Figure 1 (to Figure 1C). Site-occupancy analysis of the OST subunits.**

The extracted ion chromatography (XIC) of the tryptic peptide with and without HexNAc (blue square) from (A) N99 of Ost1p, (B) N217 of Ost1p, (C) N400 of Ost1p, (D) N539 of Stt3p, (E) N60 of Wbp1p and (F) N332 of Wbp1p are shown for the OST3 complex (OST3) and the OST6 complex (OST6). The m/z of the peptides with and without HexNAc are summarized in Supp. Table 3. The mass tolerance of XIC was 10 ppm. The corresponding MS/MS spectra from Mascot results are shown in the lower panel of each figure together with the score and the expected P value. HE represents HexNAc on the indicated asparagine (N).

(A)

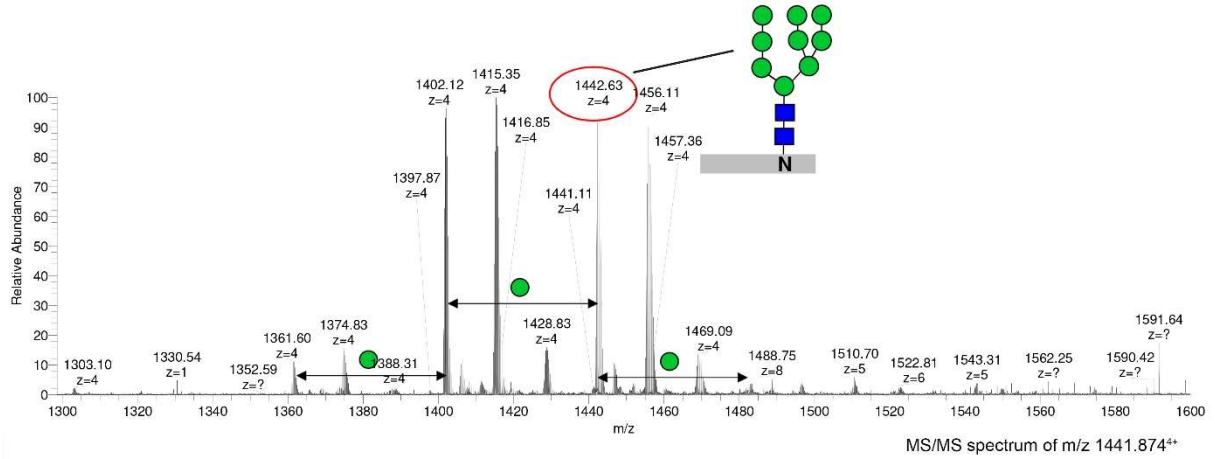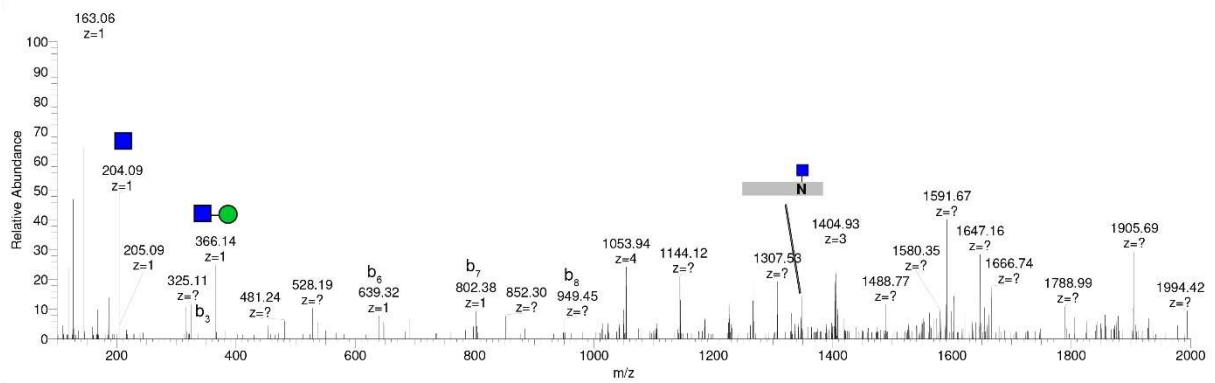

(B)

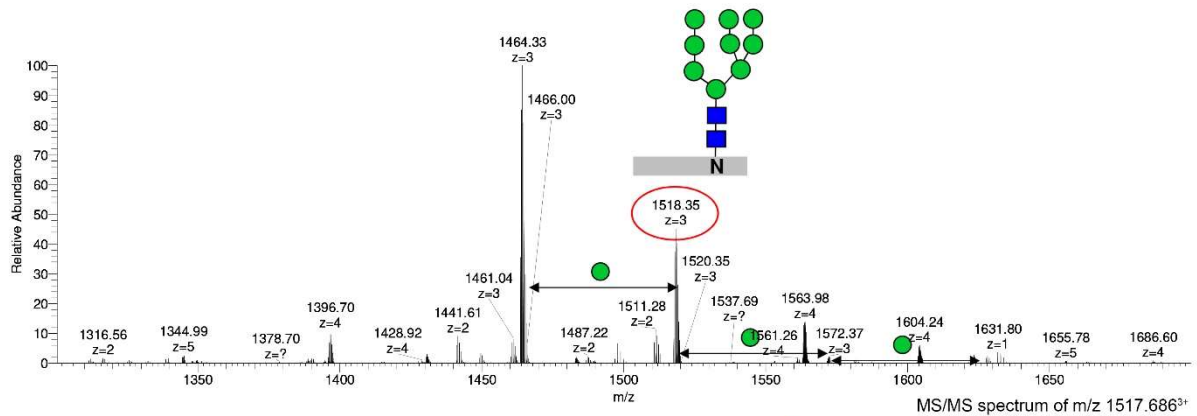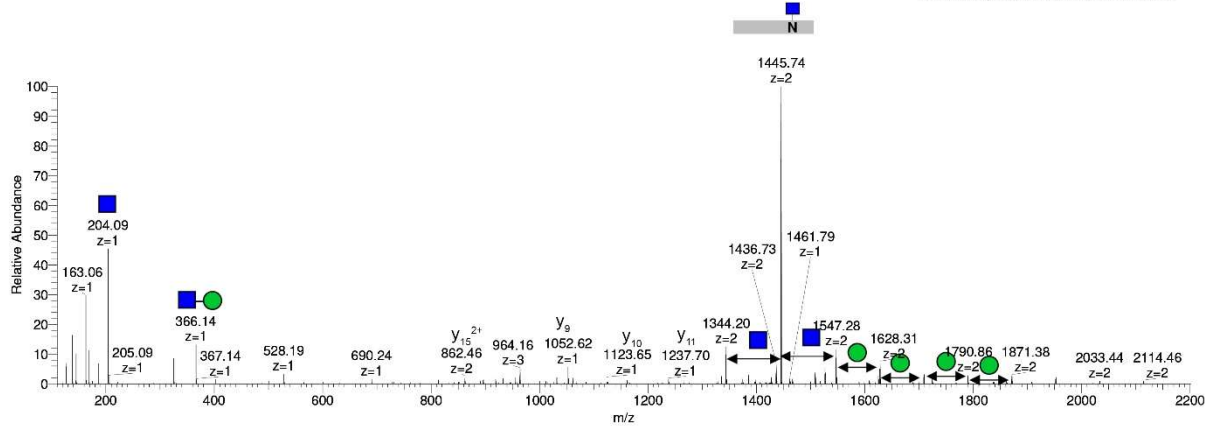

(C)

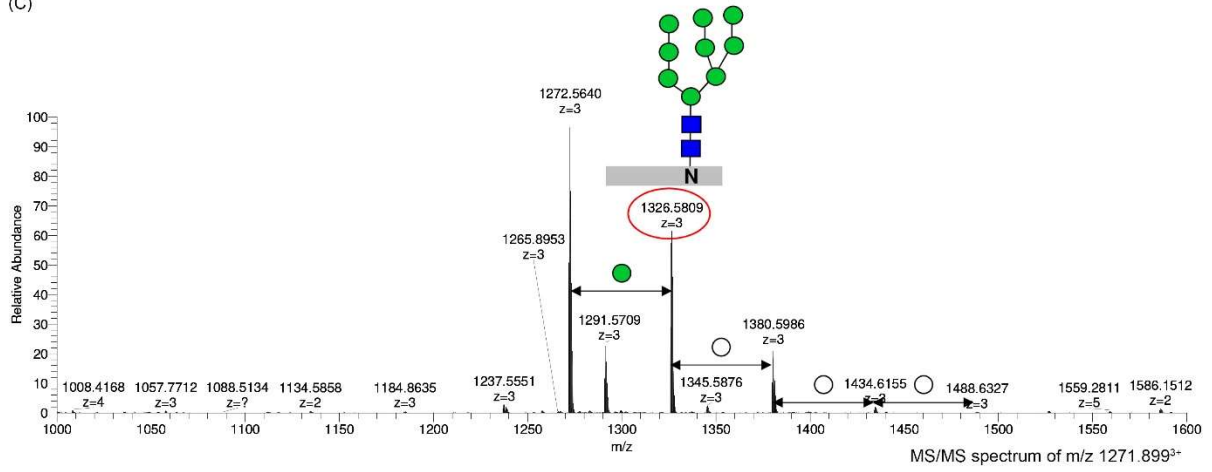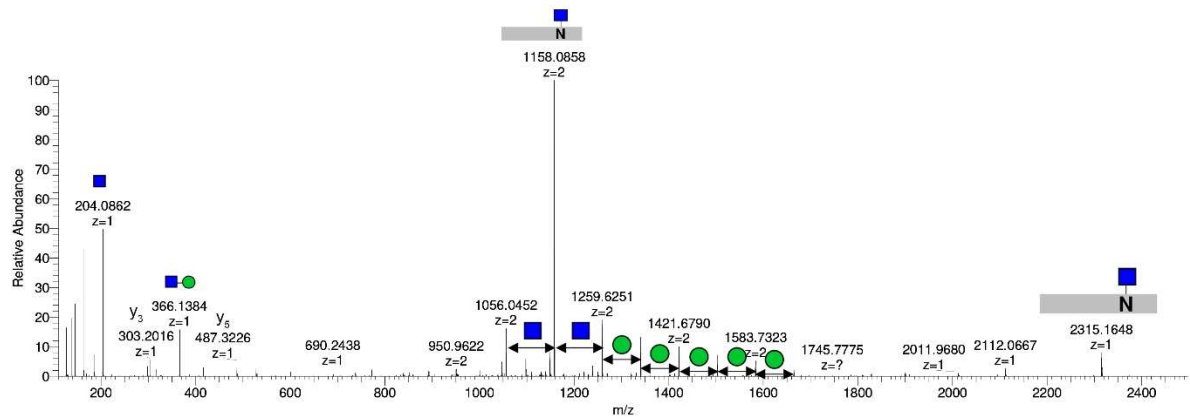

(D)

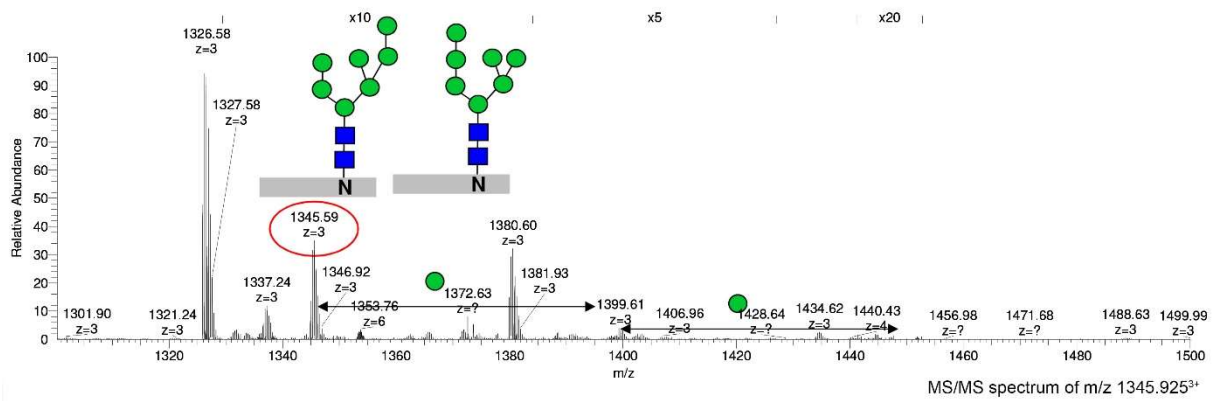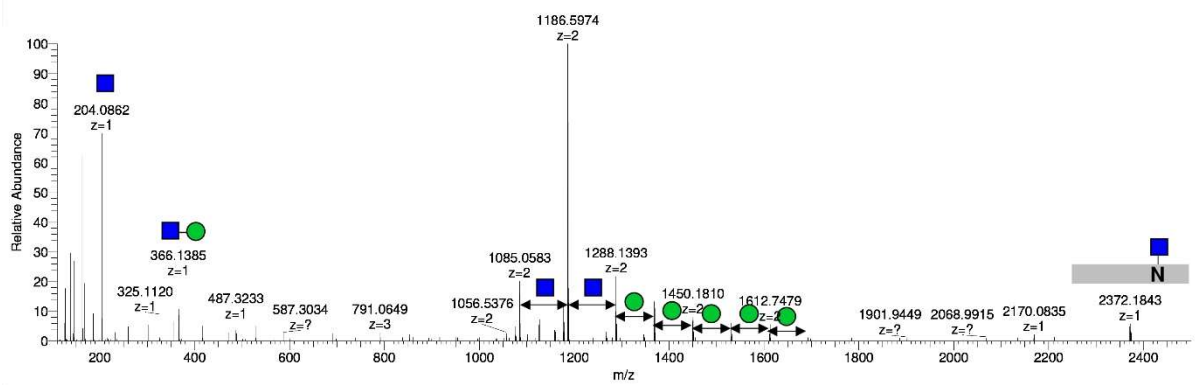

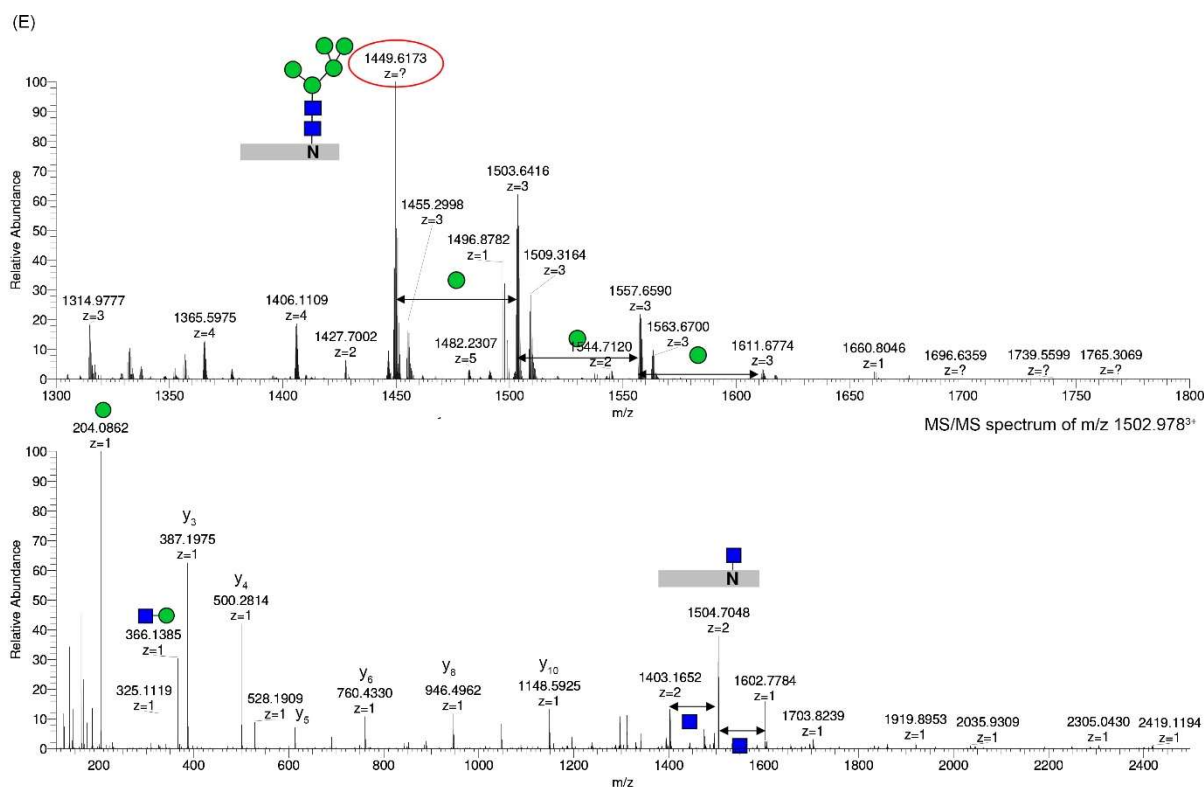

### Supp. Figure 2 (to Figure 1D). Glycosylation profiling of the OST subunits.

The MS (upper panels) and MS/MS (lower panels) spectra from (A) N99 of Ost1p, (B) N217 of Ost1p, (C) N539 of Stt3p, (D) N60 of Wbp1p and (E) N332 of Wbp1p are shown. The m/z and structure details are summarized in Supp. Table 4. The m/z circled in red indicates the m/z corresponding to the drawn glycopeptide. Blue squares represent HexNAc; green circles represent mannose (a hexose).

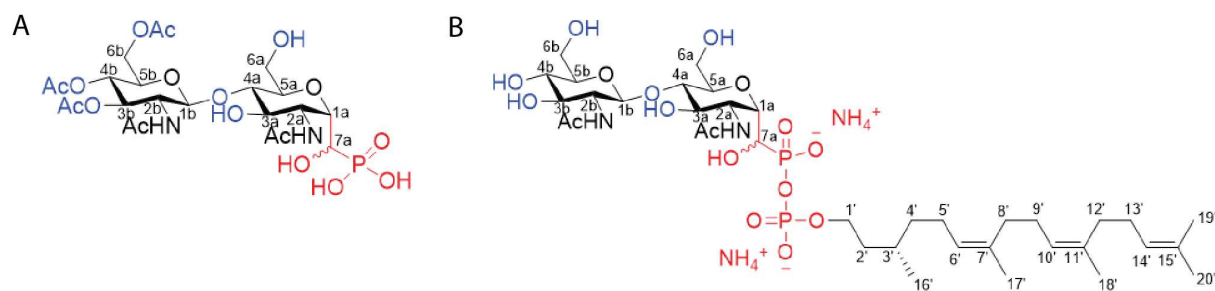

### Supp. Figure 3. Structures of a synthesis precursor and the final compound Ia (non-hydrolyzable LLO)

(A) Chitobiose hydroxy-phosphonate (minor diastereomer): (((2S,3R,4R,5S,6R)-3-acetamido-5-(((2S,3R,4R,5S,6R)-3-acetamido-4,5-diacetoxy-6-(acetoxymethyl)tetrahydro-2H-pyran-2-yl)oxy)-4-hydroxy-6-(hydroxymethyl)tetrahydro-2H-pyran-2-yl)(hydroxy)methyl)phosphonic acid.

(B) Non-hydrolyzable LLO Ia, GlcNAc<sub>2</sub>-(OH)CPP-(S)-CitronellylNeryl (C20) (minor diastereomer): (((2S,3R,4R,5S,6R)-3-acetamido-5-(((2S,3R,4R,5S,6R)-3-acetamido-4,5-dihydroxy-6-(hydroxymethyl)tetrahydro-2H-pyran-2-yl)oxy)-4-hydroxy-6-(hydroxymethyl)tetrahydro-2H-pyran-2-yl)(hydroxy)methyl)phosphonic ((S,6Z,10Z)-3,7,11,15-tetramethylhexadeca-6,10,14-trien-1-yl phosphoric) anhydride.
